# Supplementary material for: Characterization and application of a DNA aptamer binding to l-tryptophan
Source: Royal Society of Chemistry journal article supplement (doi:10.1039/c0an00550a), 2010-11-15
Supplement: c0an00550a.pdf [file c0an00550a.pdf]

# Supporting information for

  

## Characterization and application of a DNA aptamer binding to Tryprophan

*Xiaojuan Yang<sup>1,2</sup>, Tao Bing<sup>1,2</sup>, Hongcheng Mei<sup>1,2</sup>, Canliang Fang<sup>1,2</sup>, Zehui Cao<sup>1</sup>, Dihua  
Shangguan<sup>1\*</sup>*

<sup>1</sup> Beijing National Laboratory for Molecular Sciences, Key Laboratory of Analytical Chemistry for  
Living Biosystems, Institute of Chemistry, Chinese Academy of Sciences, Beijing 100190, China

<sup>2</sup> Graduate School of the Chinese Academy of Science, Beijing 100039, China

Tel & Fax: +86 10 62528509 E-mail address: [sgdh@iccas.ac.cn](mailto:sgdh@iccas.ac.cn)

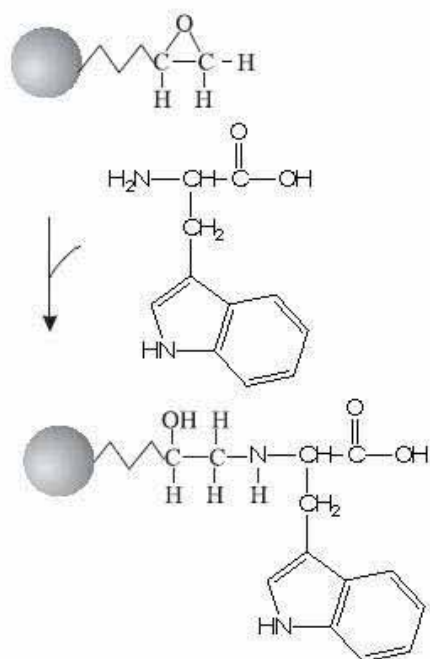

Figure S1. Immobilization procedure of L-tryptophan to the Epoxy-activated Sepharose 6B™

Table S1. The changes of the selection conditions during SELEX procedure

| Round | positive<br>( $\mu\text{L}$ ) | beads | negative<br>beads ( $\mu\text{L}$ ) | Incubating<br>time (min) | Washing<br>( $\mu\text{L}$ ) $\times$ times | buffer |
|-------|-------------------------------|-------|-------------------------------------|--------------------------|---------------------------------------------|--------|
| 1th   | 200                           |       | 0                                   | 60                       | 100 $\times$ 2                              |        |
| 2th   | 60                            |       | 20                                  | 60                       | 100 $\times$ 2                              |        |
| 3th   | 20                            |       | 20                                  | 30                       | 100 $\times$ 2                              |        |
| 4th   | 20                            |       | 40                                  | 30                       | 150 $\times$ 3                              |        |
| 5th   | 20                            |       | 60                                  | 30                       | 150 $\times$ 3                              |        |
| 6th   | 15                            |       | 60                                  | 30                       | 150 $\times$ 3                              |        |
| 7th   | 15                            |       | 60                                  | 30                       | 150 $\times$ 4                              |        |
| 8th   | 10                            |       | 60                                  | 5                        | 150 $\times$ 4                              |        |
| 9th   | 10                            |       | 60                                  | 5                        | 200 $\times$ 4                              |        |
| 10th  | 10                            |       | 60                                  | 5                        | 200 $\times$ 4                              |        |
| 11th  | 10                            |       | 60                                  | 5                        | 200 $\times$ 4                              |        |
| 12th  | 10                            |       | 60                                  | 5                        | 200 $\times$ 4                              |        |

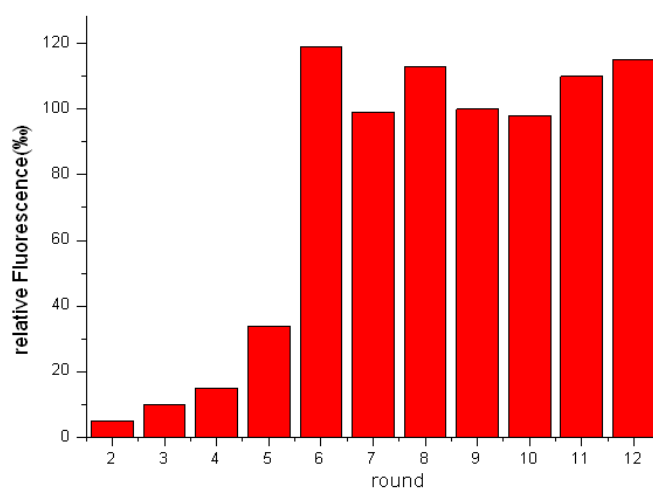

Figure S2. The progress of the selection. The bar represents the percentage of eluted ssDNA to the total amounts of ssDNA in each selection round.  $\text{Relative Fluorescence} = (F_e) \times 1000\% / (F_0)$ , where,  $F_e$  is the fluorescence intensity of the eluate.  $F_0$  is the initial fluorescence intensity before binding.

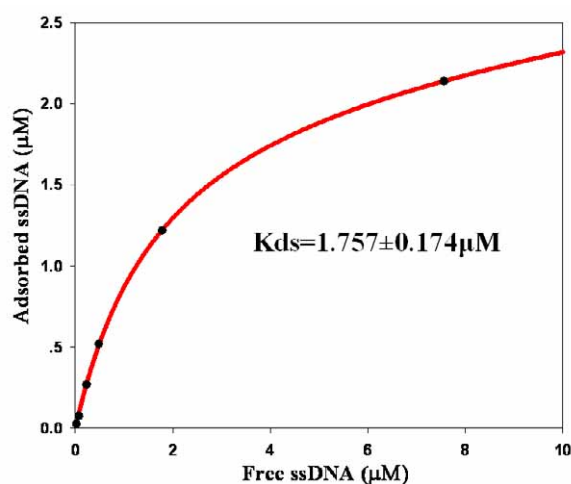

Figure S3. Binding curve of Trp3a-1 to L-tryptophan immobilized beads. Binding studies were performed with a fixed amount of L-tryptophan immobilized beads and a concentration series (0.05-10 µM) of the FAM-labelled aptamers. Binding curve was obtained and the  $K_d$  was calculated by sigmaplot 11 software
